# Supplementary material for: The meniscus-guided deposition of semiconducting polymers
Source: PubMed Central journal article supplement (PMC5803241; doi:10.1038/s41467-018-02833-9), 2018-02-07
Supplement: 41467_2018_2833_MOESM1_ESM.pdf [file 41467_2018_2833_MOESM1_ESM.pdf]

## **Description of Additional Supplementary File**

File Name: Supplementary Data 1

Description: A supporting table to summarize the device information
